# Supplementary material for: The molecular structure of [Sn(P2C2But2)] using gas-phase electron diffraction and DFT calculations
Source: Royal Society of Chemistry journal article supplement (doi:10.1039/b418171a), 2005-01-01

## The molecular structure of [Sn(P<sub>2</sub>C<sub>2</sub>Bu<sup>t</sup><sub>2</sub>)] using gas-phase electron diffraction and DFT calculations

Derek A. Wann,<sup>a</sup> Sarah L. Hinchley,<sup>a</sup> Konstantin B. Borisenko,<sup>a</sup> Heather E. Robertson,<sup>a</sup> Matthew D. Francis,<sup>b</sup> John F. Nixon<sup>b</sup> and David W. H. Rankin<sup>\*a</sup>

<sup>a</sup> School of Chemistry, University of Edinburgh, West Mains Road, Edinburgh, EH9 3JJ, UK; E-mail: d.w.h.rankin@ed.ac.uk

<sup>b</sup> Department of Chemistry, School of Life Sciences, University of Sussex, Falmer, Brighton, BN1 9QJ, UK.

**Table S1** Nozzle-to-film distances (mm), weighting functions (nm<sup>-1</sup>), scale factors, correlation parameters and electron wavelengths (pm) used in the electron diffraction study of [Sn(P<sub>2</sub>C<sub>2</sub>Bu<sup>t</sup><sub>2</sub>)], **2b**.

| Nozzle-to-film distance <sup>a</sup> | $\Delta s$ | $s_{\min}$ | $sw_1$ | $sw_2$ | $s_{\max}$ | Scale factor <sup>b</sup> | Correlation parameter | Electron wavelength |
|--------------------------------------|------------|------------|--------|--------|------------|---------------------------|-----------------------|---------------------|
| 86.06                                | 4          | 80         | 120    | 230    | 250        | 0.801(42)                 | 0.393                 | 6.020               |
| 255.26                               | 2          | 20         | 40     | 102    | 110        | 0.857(14)                 | 0.119                 | 6.020               |

<sup>a</sup> Determined by reference to the scattering pattern of benzene. <sup>b</sup> Values in parentheses are the estimated standard deviations.

**Table S2** Selected interatomic distances ( $r_a$ /pm) and amplitudes of vibration ( $u_{h1}$ /pm) for the restrained GED structure of  $[\text{Sn}(\text{P}_2\text{C}_2\text{Bu}^t_2)]$ , **2b**.<sup>a</sup>

|             | Atom pair      | $r_a$ /pm | $u_{h1}$ /pm <sup>b</sup> | Restraint |
|-------------|----------------|-----------|---------------------------|-----------|
| $u_{1-9}$   | C–H            | 110.2(3)  | 7.1(3)                    | 7.7(8)    |
| $u_{10}$    | C(3)–C(6)      | 152.1(4)  | 4.0(6)                    | —         |
| $u_{11-12}$ | C(6)–C(8/9)    | 154.8(2)  | 4.1(tied to $u_{10}$ )    | —         |
| $u_{13}$    | C(6)–C(7)      | 155.6(2)  | 4.1(tied to $u_{10}$ )    | —         |
| $u_{14-15}$ | P(2)–C(3/5)    | 180.2(3)  | 5.2(4)                    | —         |
| $u_{16}$    | Sn(1)–C(3)     | 240.7(11) | 10.5(11)                  | 10.1(10)  |
| $u_{17}$    | C(3)...C(7)    | 249.1(10) | 7.1(8)                    | 8.0(8)    |
| $u_{18-19}$ | C(7)...C(8)    | 250.6(23) | 7.1(tied to $u_{17}$ )    | —         |
| $u_{20-21}$ | C(3)...C(9)    | 252.6(8)  | 6.8(tied to $u_{17}$ )    | —         |
| $u_{22}$    | Sn(1)–P(2)     | 261.4(7)  | 7.5(8)                    | 7.7(8)    |
| $u_{23}$    | P(2)...P(4)    | 269.8(17) | 5.1(6)                    | 5.6(6)    |
| $u_{24}$    | P(2)...C(6)    | 300.0(14) | 9.0(7)                    | 8.2(8)    |
| $u_{25}$    | P(2)...C(19)   | 304.7(16) | 9.0(tied to $u_{24}$ )    | —         |
| $u_{26}$    | P(2)...C(8)    | 336.7(38) | 18.7(18)                  | 19.1(19)  |
| $u_{27}$    | P(2)...C(22)   | 341.8(39) | 18.7(tied to $u_{26}$ )   | —         |
| $u_{28}$    | Sn(1)...C(6)   | 352.7(11) | 12.1(12)                  | 12.4(12)  |
| $u_{29}$    | P(2)...C(7)    | 362.0(28) | 18.0(25)                  | —         |
| $u_{30}$    | P(2)...C(20)   | 369.3(40) | 18.0(tied to $u_{29}$ )   | —         |
| $u_{31-32}$ | Sn(1)...C(8/9) | 393.5(32) | 22.7(17)                  | —         |
| $u_{33}$    | P(2)...C(9)    | 424.1(12) | 9.8(9)                    | —         |
| $u_{34}$    | P(2)...C(21)   | 426.6(14) | 9.9(tied to $u_{33}$ )    | —         |
| $u_{35}$    | Sn(1)...C(7)   | 480.7(11) | 13.8(12)                  | 12.0(12)  |

<sup>a</sup> Estimated standard deviations, as obtained in the least squares refinement, are given in parentheses. <sup>b</sup> Amplitudes not refined were fixed at the values obtained using the force field calculated at B3PW91/LanL2DZ on Sn and 6-31G\* on P, C, and H. Other amplitudes were also included and fixed at this level but are not shown here.

**Table S3** Least-squares correlation matrix ( $\times 100$ ) for  $[\text{Sn}(\text{P}_2\text{C}_2\text{Bu}^t_2)]$ , **2b**.<sup>a</sup>

|          | $p_2$ | $p_{10}$ | $p_{21}$ | $u_6$ | $k_1$ | $k_2$ |
|----------|-------|----------|----------|-------|-------|-------|
| $p_1$    | –50   |          |          |       | –58   |       |
| $p_5$    |       | –52      |          |       |       |       |
| $p_{12}$ |       |          |          | –75   |       |       |
| $p_{18}$ |       |          | 81       |       |       |       |
| $u_1$    |       |          |          |       | 62    |       |

<sup>a</sup> Only elements with absolute values  $\geq 50\%$  are shown;  $k_1$  and  $k_2$  are scale factors.

**Table S4** GED coordinates for [Sn(P<sub>2</sub>C<sub>2</sub>Bu<sup>t</sup><sub>2</sub>)], **2b**.<sup>a</sup>

| Atom  | <i>x</i> | <i>y</i> | <i>z</i> |
|-------|----------|----------|----------|
| Sn(1) | 0.0000   | 2.2002   | 0.0000   |
| P(2)  | 0.0000   | 0.0000   | 1.3626   |
| C(3)  | 1.1809   | 0.0986   | 0.0000   |
| P(4)  | 0.0000   | 0.0000   | -1.3626  |
| C(5)  | -1.1809  | 0.0986   | 0.0000   |
| C(6)  | 2.7139   | -0.1401  | 0.0000   |
| C(7)  | 2.9627   | -1.6776  | 0.0009   |
| C(8)  | 3.3627   | 0.4916   | -1.2673  |
| C(9)  | 3.3649   | 0.4990   | 1.2625   |
| H(10) | 4.0667   | -1.9066  | 0.0111   |
| H(11) | 2.5158   | -2.1588  | -0.9161  |
| H(12) | 2.4985   | -2.1599  | 0.9082   |
| H(13) | 4.4785   | 0.3295   | -1.2714  |
| H(14) | 3.1718   | 1.6022   | -1.3060  |
| H(15) | 2.9405   | 0.0327   | -2.2067  |
| H(16) | 4.4815   | 0.3422   | 1.2625   |
| H(17) | 2.9488   | 0.0412   | 2.2052   |
| H(18) | 3.1689   | 1.6088   | 1.2982   |
| C(19) | -2.7139  | -0.1401  | 0.0000   |
| C(20) | -2.9627  | -1.6776  | -0.0009  |
| C(21) | -3.3627  | 0.4916   | 1.2671   |
| C(22) | -3.3649  | 0.4990   | -1.2625  |
| H(23) | -4.0667  | -1.9066  | -0.0111  |
| H(24) | -2.5158  | -2.1581  | 0.9161   |
| H(25) | -2.4985  | -2.1599  | -0.9082  |
| H(26) | -4.4785  | 0.3295   | 1.2714   |
| H(27) | -3.1718  | 1.6022   | 1.3060   |
| H(28) | -2.9405  | 0.0327   | 2.2067   |
| H(29) | -4.4815  | 0.3422   | -1.2625  |
| H(30) | -2.9488  | 0.0412   | -2.2052  |
| H(31) | -3.1689  | 1.6088   | -1.2982  |

<sup>a</sup> All coordinates are  $r_a$  in Å.

**Table S5** Calculated coordinates (B3PW91/6-31G\*/LanL2DZ) for [Sn(P<sub>2</sub>C<sub>2</sub>Bu'<sub>2</sub>)], **2b**.

| Atom  | <i>x</i> | <i>y</i> | <i>z</i> |
|-------|----------|----------|----------|
| Sn(1) | 0.0000   | 0.0000   | 1.5772   |
| P(2)  | 1.3678   | 0.0000   | -0.6732  |
| C(3)  | 0.0000   | -1.1813  | -0.5416  |
| P(4)  | -1.3678  | -0.0000  | -0.6732  |
| C(5)  | -0.0000  | 1.1813   | -0.5416  |
| C(6)  | 0.0000   | -2.6845  | -0.7173  |
| C(7)  | 0.0000   | -2.9910  | -2.2308  |
| C(8)  | 1.2554   | -3.3041  | -0.0845  |
| C(9)  | -1.2553  | -3.3043  | -0.0845  |
| H(10) | 0.8868   | -2.5675  | -2.7158  |
| H(11) | 0.0001   | -4.0747  | -2.4041  |
| H(12) | -0.8867  | -2.5675  | -2.7158  |
| H(13) | 1.2710   | -3.1461  | 1.0005   |
| H(14) | 1.2852   | -4.3848  | -0.2700  |
| H(15) | 2.1710   | -2.8689  | -0.5029  |
| H(16) | -2.1709  | -2.8689  | -0.5028  |
| H(17) | -1.2850  | -4.3849  | -0.2699  |
| H(18) | -1.2709  | -3.1461  | 1.0005   |
| C(19) | -0.0000  | 2.6845   | -0.7173  |
| C(20) | -0.0000  | 2.9910   | -2.2308  |
| C(21) | -1.2554  | 3.3041   | -0.0845  |
| C(22) | 1.2553   | 3.3043   | -0.0845  |
| H(23) | -0.8868  | 2.5675   | -2.7158  |
| H(24) | -0.0001  | 4.0747   | -2.4041  |
| H(25) | 0.8867   | 2.5675   | -2.7158  |
| H(26) | -1.2710  | 3.1461   | 1.0005   |
| H(27) | -1.2852  | 4.3848   | -0.2700  |
| H(28) | -2.1710  | 2.8689   | -0.5029  |
| H(29) | 2.1709   | 2.8689   | -0.5028  |
| H(30) | 1.2850   | 4.3849   | -0.2699  |
| H(31) | 1.2709   | 3.1461   | 1.0005   |

Energy = -1077.502038 Hartrees (corrected for ZPE).

All coordinates are in Å.

**Table S6** Calculated coordinates (B3PW91/6-31G\*/LanL2DZ) for [Sn(P<sub>2</sub>C<sub>2</sub>H<sub>2</sub>)], **3**.

| Atom  | <i>x</i> | <i>y</i> | <i>z</i> |
|-------|----------|----------|----------|
| Sn(1) | 0.0000   | 0.0000   | 1.0351   |
| P(2)  | 0.0000   | 1.3710   | -1.2177  |
| C(3)  | 1.1613   | 0.0000   | -1.0797  |
| P(4)  | 0.0000   | -1.3710  | -1.2177  |
| C(5)  | -1.1613  | 0.0000   | -1.0797  |
| H(6)  | 2.2453   | 0.0000   | -1.1341  |
| H(7)  | -2.2453  | 0.0000   | -1.1341  |

Energy = -763.324630 Hartrees (corrected for ZPE).

All coordinates are in Å.

**Table S7** Calculated coordinates (B3PW91/6-31G\*) for [P<sub>2</sub>C<sub>2</sub>Bu'<sub>2</sub>], **4**.

| Atom  | <i>x</i> | <i>y</i> | <i>z</i> |
|-------|----------|----------|----------|
| P(1)  | 1.3795   | -0.0122  | 0.0000   |
| C(2)  | -0.1428  | 1.1642   | 0.0000   |
| P(3)  | -1.3797  | 0.0122   | 0.0000   |
| C(4)  | 0.1428   | -1.1642  | 0.0000   |
| C(5)  | -0.1458  | 2.6577   | 0.0000   |
| C(6)  | -1.5778  | 3.2086   | 0.0000   |
| C(7)  | 0.6035   | 3.1488   | 1.2573   |
| C(8)  | 0.6035   | 3.1488   | -1.2573  |
| H(9)  | -2.1292  | 2.8754   | 0.8870   |
| H(10) | -1.5679  | 4.3049   | 0.0000   |
| H(11) | -2.1292  | 2.8754   | -0.8869  |
| H(12) | 1.6307   | 2.7673   | 1.2871   |
| H(13) | 0.6508   | 4.2447   | 1.2601   |
| H(14) | 0.0925   | 2.8242   | 2.1701   |
| H(15) | 0.0925   | 2.8242   | -2.1701  |
| H(16) | 0.6508   | 4.2447   | -1.2601  |
| H(17) | 1.6307   | 2.7673   | -1.2871  |
| C(18) | 0.1458   | -2.6577  | 0.0000   |
| C(19) | 1.5778   | -3.2086  | 0.0000   |
| C(20) | -0.6035  | -3.1488  | 1.2573   |
| C(21) | -0.6035  | -3.1488  | -1.2573  |
| H(22) | 2.1292   | -2.8754  | 0.8870   |
| H(23) | 1.5679   | -4.3049  | 0.0000   |
| H(24) | 2.1292   | -2.8754  | -0.8869  |
| H(25) | -1.6307  | -2.7673  | 1.2871   |
| H(26) | -0.6508  | -4.2447  | 1.2601   |
| H(27) | -0.0925  | -2.8242  | 2.1701   |
| H(28) | -0.0925  | -2.8242  | -2.1701  |
| H(29) | -0.6508  | -4.2447  | -1.2601  |
| H(30) | -1.6307  | -2.7673  | -1.2871  |

Energy = -1074.038806 Hartrees (corrected for ZPE).

All coordinates are in Å.

**Table S8** Calculated coordinates (B3PW91/6-31G\*/LanL2DZ) for [Sn(C<sub>4</sub>Bu<sup>t</sup><sub>2</sub>H<sub>2</sub>)], **5**.

| Atom  | <i>x</i> | <i>y</i> | <i>z</i> |
|-------|----------|----------|----------|
| Sn(1) | -1.5890  | -0.0002  | 0.0057   |
| C(2)  | 0.5256   | -1.0284  | -0.0020  |
| C(3)  | 0.5163   | 0.0000   | -1.0447  |
| C(4)  | 0.5253   | 1.0285   | -0.0020  |
| C(5)  | 0.5231   | 0.0000   | 1.0410   |
| C(6)  | 0.8581   | 0.0002   | -2.5111  |
| C(7)  | 2.3981   | 0.0004   | -2.6389  |
| C(8)  | 0.3008   | -1.2557  | -3.1956  |
| C(9)  | 0.3005   | 1.2560   | -3.1955  |
| H(10) | 2.8300   | -0.8858  | -2.1604  |
| H(11) | 2.6990   | 0.0005   | -3.6945  |
| H(12) | 2.8298   | 0.8866   | -2.1603  |
| H(13) | -0.7948  | -1.2682  | -3.1648  |
| H(14) | 0.6139   | -1.2909  | -4.2464  |
| H(15) | 0.6640   | -2.1687  | -2.7091  |
| H(16) | 0.6634   | 2.1691   | -2.7089  |
| H(17) | 0.6136   | 1.2914   | -4.2462  |
| H(18) | -0.7951  | 1.2683   | -3.1647  |
| C(19) | 0.8750   | 0.0000   | 2.5050   |
| C(20) | 2.4158   | 0.0002   | 2.6223   |
| C(21) | 0.3221   | 1.2557   | 3.1933   |
| C(22) | 0.3224   | -1.2560  | 3.1931   |
| H(23) | 2.8443   | 0.8865   | 2.1408   |
| H(24) | 2.7240   | 0.0002   | 3.6758   |
| H(25) | 2.8445   | -0.8859  | 2.1407   |
| H(26) | -0.7737  | 1.2680   | 3.1699   |
| H(27) | 0.6423   | 1.2910   | 4.2418   |
| H(28) | 0.6817   | 2.1688   | 2.7042   |
| H(29) | 0.6823   | -2.1689  | 2.7040   |
| H(30) | 0.6427   | -1.2913  | 4.2417   |
| H(31) | -0.7734  | -1.2686  | 3.1698   |
| H(32) | 0.6564   | -2.1033  | -0.0026  |
| H(33) | 0.6559   | 2.1034   | -0.0024  |

Energy = -472.194130 Hartrees (corrected for ZPE).

All coordinates are in Å.

**Table S9** Calculated coordinates (B3PW91/6-31G\*) for [Li<sub>2</sub>(P<sub>2</sub>C<sub>2</sub>Bu<sub>2</sub><sup>t</sup>)], **6**.

| Atom   | <i>x</i> | <i>y</i> | <i>z</i> |
|--------|----------|----------|----------|
| Li(1)  | 0.0000   | 0.0000   | -1.9281  |
| P(2)   | 0.0000   | -1.3843  | -0.0649  |
| C(3)   | 1.1816   | 0.0000   | -0.0807  |
| P(4)   | 0.0000   | 1.3843   | -0.0648  |
| C(5)   | -1.1816  | 0.0000   | -0.0807  |
| C(6)   | 2.6982   | 0.0000   | 0.0140   |
| C(7)   | 3.1455   | 0.0000   | 1.4933   |
| C(8)   | 3.2746   | -1.2534  | -0.6636  |
| C(9)   | 3.2746   | 1.2535   | -0.6635  |
| H(10)  | 2.7667   | -0.8930  | 2.0093   |
| H(11)  | 4.2399   | -0.0000  | 1.5919   |
| H(12)  | 2.7667   | 0.8928   | 2.0093   |
| H(13)  | 3.0331   | -1.2653  | -1.7339  |
| H(14)  | 4.3670   | -1.2903  | -0.5611  |
| H(15)  | 2.8640   | -2.1688  | -0.2205  |
| H(16)  | 2.8640   | 2.1688   | -0.2204  |
| H(17)  | 4.3670   | 1.2903   | -0.5611  |
| H(18)  | 3.0331   | 1.2654   | -1.7338  |
| C(19)  | -2.6982  | 0.0000   | 0.0140   |
| C(20)  | -3.1455  | 0.0000   | 1.4933   |
| C(21)  | -3.2746  | 1.2535   | -0.6635  |
| C(22)  | -3.2746  | -1.2534  | -0.6636  |
| H(23)  | -2.7667  | 0.8929   | 2.0093   |
| H(24)  | -4.2399  | 0.0000   | 1.5919   |
| H(25)  | -2.7667  | -0.8930  | 2.0093   |
| H(26)  | -3.0331  | 1.2654   | -1.7338  |
| H(27)  | -4.3670  | 1.2903   | -0.5610  |
| H(28)  | -2.8640  | 2.1688   | -0.2204  |
| H(29)  | -2.8640  | -2.1688  | -0.2205  |
| H(30)  | -4.3670  | -1.2903  | -0.5611  |
| H(31)  | -3.0331  | -1.2653  | -1.7339  |
| Li(32) | 0.0000   | -0.0000  | 1.7920   |

Energy = -1089.185305 Hartrees (corrected for ZPE).

All coordinates are in Å.



**Figure S1** Molecular-scattering intensity and final weighted difference curves for  $[\text{Sn}(\text{P}_2\text{C}_2\text{Bu}'_2)]$ , **2b**, at nozzle-to-film distances of (a) 255 mm and (b) 86 mm.

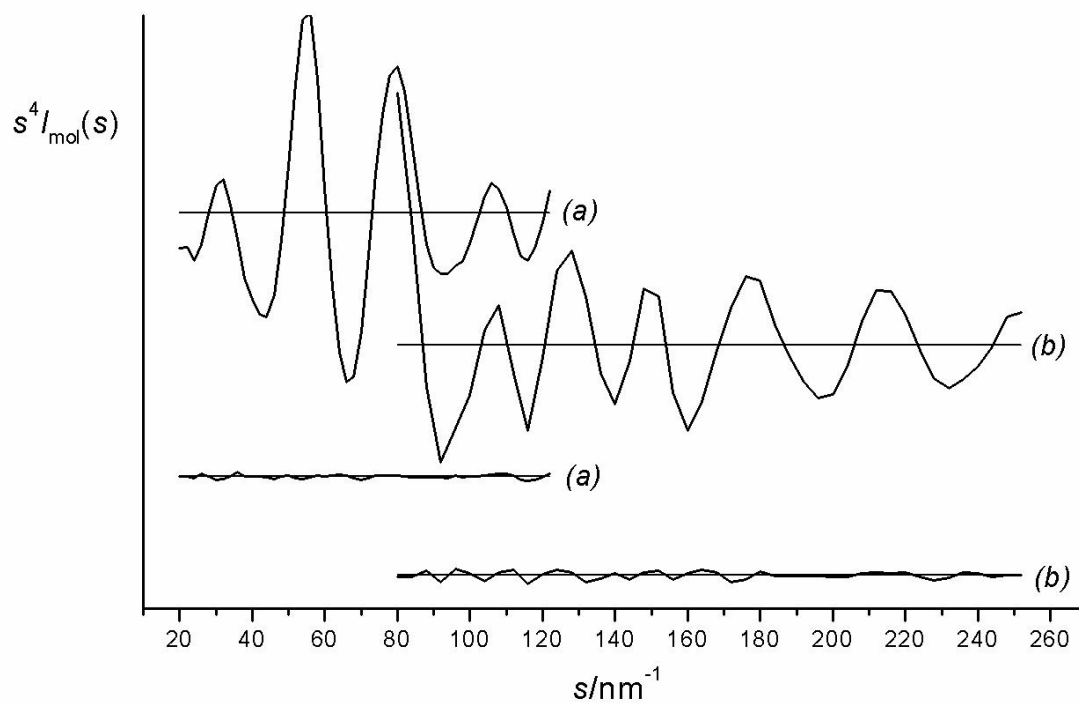

Supplement: b418171a.pdf [file b418171a.pdf]
